# Supplementary material for: Drotrecogin Alfa (Activated) for Adults with Severe Sepsis and a Low Risk of Death
Source: Atypon-hosted journal article supplement (doi:10.1056/nejmoa050935), 2005-09-28
Supplement: nejm_abraham_1332sa1-2.pdf [file nejm_abraham_1332sa1-2.pdf]

# Supplementary Appendix 1

This appendix has been provided by the authors to give readers additional information about their work.

Supplement to: Abraham E, Laterre P-F, Garg R, et al. Drotrecogin alfa (activated) for adults with severe sepsis and a low risk of death. *N Engl J Med* 2005;353:1232-41.

## Appendix 1. Organ Dysfunction Definitions.

| Organ Dysfunction              | Criteria                                                                                                                                                                                                                                                                                                                                                   |
|--------------------------------|------------------------------------------------------------------------------------------------------------------------------------------------------------------------------------------------------------------------------------------------------------------------------------------------------------------------------------------------------------|
| Cardiovascular                 | An arterial systolic blood pressure (SBP) of $\leq 90$ mm Hg or a mean arterial pressure (MAP) $\leq 70$ mm Hg for at least 1 hour despite adequate fluid resuscitation, adequate intravascular volume status, or the need for vasopressors to maintain SBP $\geq 90$ mm Hg or MAP $\geq 70$ mm Hg. <sup>a</sup>                                           |
| Renal                          | Average urine output $< 0.5$ mL/kg/h for 1 hour despite adequate fluid resuscitation. <sup>a,b</sup>                                                                                                                                                                                                                                                       |
| Respiratory                    | Evidence of acute pulmonary dysfunction $\text{PaO}_2/\text{FiO}_2 \leq 250$ (adjusted for altitude) and, if measured, a pulmonary capillary wedge pressure not suggestive of central volume overload. <sup>c</sup>                                                                                                                                        |
| Hematologic                    | Platelet count $< 80,000/\text{mm}^3$ or a 50% decrease in platelet count from the highest value recorded over the last 3 days                                                                                                                                                                                                                             |
| Unexplained metabolic acidosis | Defined by (1) pH $\leq 7.30$ or base deficit $\geq 5.0$ mEq/L <b>and</b> (2) a plasma lactate level $> 1.5$ times the upper limit of normal for the reporting laboratory. Measurement of pH or base deficit and lactate level should occur within a clinically relevant time interval such that a causal relationship exists between the measured values. |

<sup>a</sup> Adequate fluid resuscitation or adequate intravascular volume is defined as one or more of the following:

(1) the administration of an intravenous fluid bolus ( $\geq 500$  mL of crystalloid solution,  $\geq 20$  g of albumin, or  $\geq 200$  mL of other colloids administered over 30 minutes or less); (2) pulmonary arterial wedge pressure  $\geq 12$  mm Hg; or (c) central venous pressure  $\geq 8$  mm Hg. Vasopressors are defined as the following: (1) dopamine  $\geq 5$  microgram/kg/min; or (2) norepinephrine, epinephrine, or phenylephrine at any dose. Dobutamine or dopexamine are not considered vasopressors.

<sup>b</sup> In the presence of preexisting impairment of renal function (defined as a serum creatinine concentration  $> 2$  times the upper limit of the normal reference range for the institution prior to the onset of sepsis), the patient must meet one of the other four organ failure criteria.

<sup>c</sup> If the lung is also the suspected site of infection, the patient must have a  $\text{PaO}_2/\text{FiO}_2 \leq 200$ .  $\text{PaO}_2$  altitude adjustment: 760 divided by barometric pressure multiplied by  $\text{PaO}_2$ .

**Appendix Figure 1. Study Design of ADDRESS Trial.** \* The treatment period was defined as day 0 through day 6 to account for interruptions in the study drug infusion. The study drug infusion started on day 0 and continued until the patient received 96 hours  $\pm$ 1 hour of study drug. \*\* Study drug infusion was started as soon as possible (within a maximum of 6 hours) after obtaining patient treatment assignment.

**Appendix Figure 2. Distribution of APACHE II Scores in Patients Enrolled in the ADDRESS Trial compared with the PROWESS Trial.** Percentage of enrolled patients with given APACHE II score is indicated by each bar. Black bars represent ADDRESS patients and gray bars represent PROWESS patients.



Appendix Figure 2

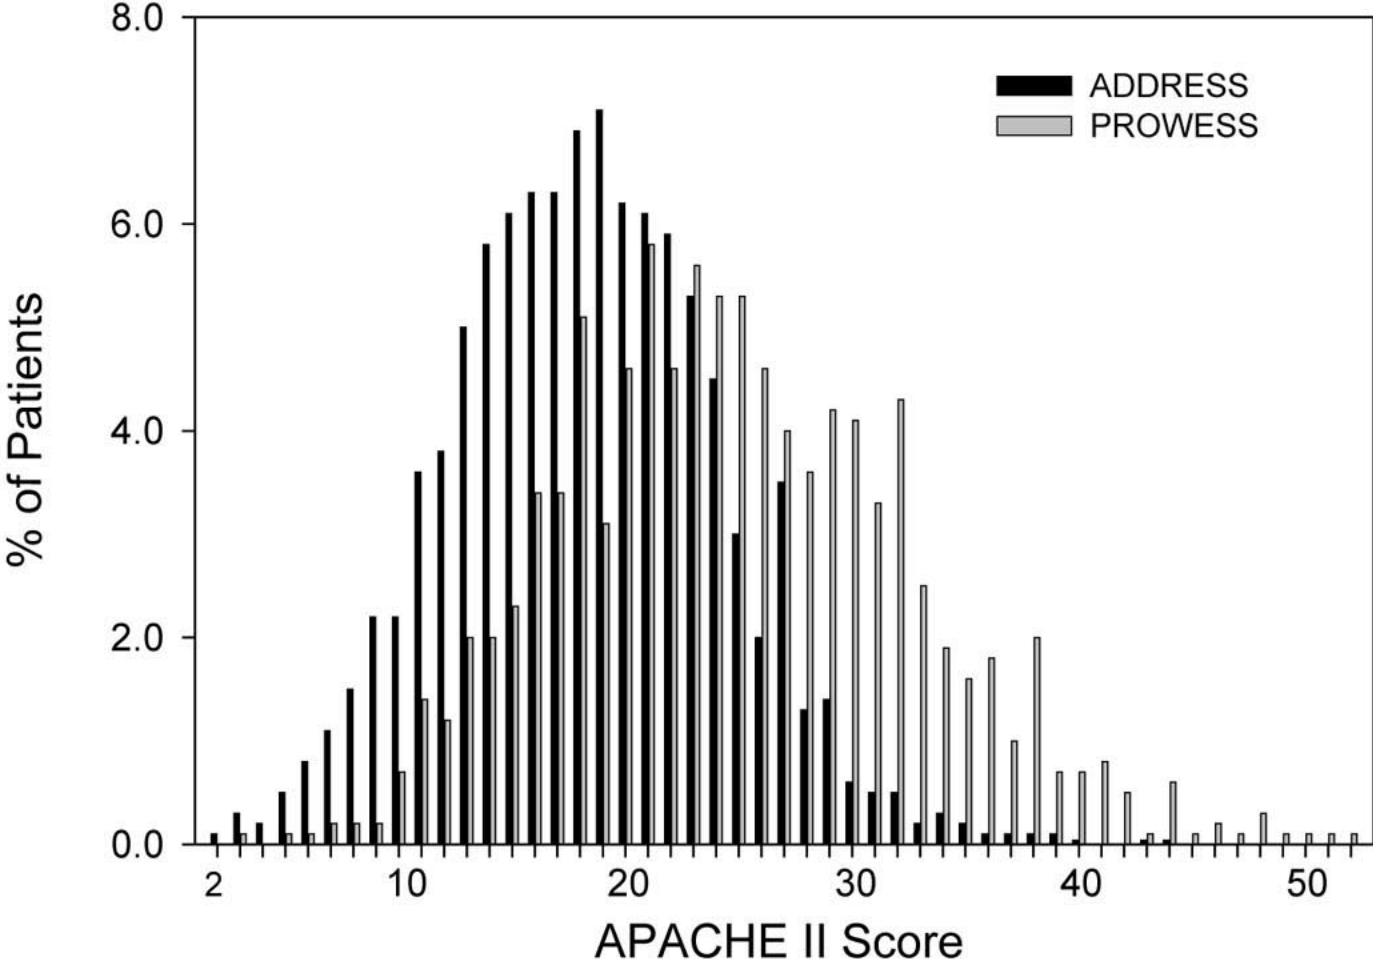

## Supplementary Appendix 2

This appendix has been provided by the authors to give readers additional information about their work.

Supplement to: Abraham E, Laterre P-F, Garg R, et al. Drotrecogin alfa (activated) for adults with severe sepsis and a low risk of death. *N Engl J Med* 2005;353:1232-41.

**ADDRESS Investigators: United States:** University of Colorado Health Sciences Center, Denver, CO – E. Abraham; Straub Clinic and Hospital, Honolulu, HI – R. Adaniya; St. Joseph’s/Candler Health System, Savannah, GA – M. Ahmed; Texas Tech University Health Sciences Center, Amarillo, TX – R. Akins; University of North Texas Health Science Center, Fort Worth, TX – S. Al-Farra; University of California Davis Medical Center, Sacramento, CA – T. Albertson; Morton Plant Hospital, Clearwater, FL – D. Amin; Bay Pines Veterans Affairs Medical Center, Bay Pines, FL – C. Anderson; University Hospital, San Antonio, TX – A. Anzueto; Riverside Community Hospital, Riverside, CA – E. Ardila; Skyline Medical Center, Nashville, TN – M. Arons; JFK Medical Center, Atlantis, FL – J. Arrascue; Avera McKennan Hospital, Sioux Falls, SD – A. Assimacopoulos; Crouse Hospital, Syracuse, NY – R. Acevedo; Houston Veterans Administration Medical Center, Houston, TX – S. Awad; University of Mississippi Medical Center, Jackson, MS – A. Badr; Lynchburg General Hospital, Lynchburg, VA – A. Baker; Ben Taub General Hospital, Houston, TX – V. Bandi; University of Tennessee Medical Center, Knoxville, TN – P. Banick; Stony Brook University Hospital, Stony Brook, NY – D. Baram; Kettering Medical Center, Dayton, OH – R. Barker; Jackson Hospital, Montgomery, AL – G. Bedsole; Scottsdale Healthcare, Scottsdale, AZ – C. Beechler; Fairview-University Medical Center, Minneapolis, MN – G. Beilman; Western Montana Clinic, Missoula, MT – W. Bekemeyer; St. Margaret’s Mercy North, Hammond, IN – G. Bergen; University of Kentucky Chandler Medical Center, Lexington, KY – A. Bernard; Peace Health St. Joseph’s Hospital, Bellingham, WA – D. Berry; St. Francis Hospital, Tulsa, OK – M. Boomer; Kaleida Health/Buffalo General Hospital, Buffalo, NY – F. Booth; St. Anthony Central Hospital, Denver, CO – T. Bost; York Hospital, York, PA – T. Boudier; Norman Regional Medical Center, Norman, OK – A. Boyd; University Hospital, Augusta, GA – A. Brannen; Wellstar Kennestone Hospital System, Marietta, GA – W. Bray; North Colorado Medical Center, Greeley, CO – J. Breen; University of North Texas Health Science Center, Fort Worth, TX – D. Brickey; MacNeal Hospital, Berwyn, IL – J. Brofman; California Pacific Medical Center, San Francisco, CA – C. Brown; St. Mary’s Health System, Knoxville, TN – M. Brunson; Palmetto Richland Memorial Hospital University of South Carolina, Columbia, SC – R. Bynoe; University of Texas Medical Branch, Galveston, TX – V. Cardenas, Jr.;

University of North Carolina Hospitals, Chapel Hill, NC – S. Carson; St. Vincent Catholic Medical Centers of NY, New York, NY – C. Carpati; St. Tammany Parish Hospital, Covington, LA – R. Casey; Bryan LGH Medical Center, Lincoln, NE – A. Chakraborty; Providence Everett Medical Center, Everett, WA – S. Chalaka; Peninsula Regional Medical Center, Salisbury, MD – R. Chasse; Veterans Administration Medical Center, Louisville, KY – W. Cheadle; Orlando Regional Medical Center, Orlando, FL – M. Cheatham; Rochester General Hospital, Rochester, NY – S. Chhangani; Lehigh Valley Hospital, Allentown, PA – M. Cipolle; Margaret R. Pardee Memorial Hospital, Hendersonville, NC – L. Clary; Louisiana State University Health Sciences Center, Shreveport, LA – S. Conrad; Milton S. Hershey Medical Center, Hershey, PA – R. Cooney; Missouri Baptist Medical Center, St. Louis, MO – M. Cox; Baptist Medical Center, Birmingham, AL – M. Crain; Barnes-Jewish St. Peter’s Hospital, St. Peters, MO – H. Cranston; Kent County Memorial Hospital, Warwick, RI – M. Dacey; Dekalb Medical Center, Decatur, GA – T. Marini; VCU Health System Medical College of Virginia Hospital, Richmond, VA – M. de Wit; West Virginia University, Robert C. Byrd Health Science Center, Morgantown, WV – H. Dedhia; Hamot Medical Clinic, Erie, PA; Richard Dew, RPH, Massachusetts General Hospital, Boston, MA – G. DeJoya; BRANY/Montefiore Medical Center, Bronx, NY – P. Dicipinigaitis; Memorial Hospital at Gulfport, Gulfport, MS – J. Douglas; Regions Hospital, St. Paul, MN – D. Dries; Alexian Brothers Medical Center, Elk Grove Village, IL – G. Dugan; Tampa General Hospital, Tampa, FL – R. Durham; North Fulton Regional Hospital, Roswell, GA – L. Dutta; Lovelace Health Systems, Albuquerque, NM – P. Economou; Providence Hospital, Southfield, MI – W. Farra; Alameda County Medical Center, Oakland, CA – C. Feeney; North Shore Medical Center, Miami, FL – T. Ferreira; Floyd Memorial Hospital, New Albany, IN – E. Fletcher; Medical Center of Aurora, Aurora, CO – J. Forrester; Boston University Medical Center, Boston, MA – R. Forse; St. Vincent Hospital, Indianapolis, IN – J. Fraiz; University of Louisville, Louisville, KY – G. Franklin; Mississippi Baptist Medical Center, Jackson, MS – W. Frazier; Overlake Hospital Medical Center, Bellevue, WA – T. Freudenberger; Doctor’s Hospital Augusta, Augusta, GA – B. Friedman; Milford Hospital, Milford, CT – L. Friedman; University of Texas Southwestern Medical Center at Dallas, Dallas, TX – R. Friese; University of New Mexico Health Sciences

Center, Albuquerque, NM – D. Fry; Integris Southwest Medical Center, Oklahoma City, OK – V. Frydrych; University of Florida, Gainesville, FL – T. Gallagher; LBJ General Hospital, Houston, TX – D. Gaitanaru; Nassau University Medical Center, East Meadow, NY – L. George; Mercy Medical Center, Des Moines, IA – D. Gervich; Nassau University Medical Center, East Meadow, NY – S. Ghulam; Anaheim Memorial Hospital, Anaheim, CA – H. Gogia; Baptist Memorial Hospital Memphis, Memphis, TN – E. Golden, Jr.; Pocono Medical Center, East Stroudsburg, PA – J. Goldner; Veterans Affairs Medical Center, Houston, TX – S. Goodknight-White; Thomas Jefferson University Hospital, Philadelphia, PA – J. Gottlieb; Duke University Medical Center, Durham, NC – J. Govert; Springfield Clinic, Springfield, IL – D. Graham; Geisinger Medical Center, Danville, PA – A. Griffin; Northern Michigan Hospital, Petoskey, MI – D. Griffin; Legacy Emmanuel Hospital and Health Care Center, Portland, OR – K. Gubler; Erlanger Health System, Chattanooga, TN – J. Gunter, Jr.; Sacred Heart Hospital, Allentown, PA – A. Gupta; Vanderbilt University Medical Center, Nashville, TN – J. Guy; Graves Gilbert Clinic, Bowling Green, KY – J. Hansbrough; Massachusetts General Hospital, Boston, MA – R. Harris; Lakeland Hospital, St. Joseph MI – M. Harrison; MERC-Cook Research, Grand Rapids, MI – M. Harrison; Northside Hospital, Atlanta, GA – R. Haynes; Methodist LeBonheur Healthcare Foundation, Memphis, TN – A. Headley; Baylor Medical Center at Irving, Irving, TX – P. Heidbrink; Akron General Medical Center, Akron, OH – D. Heiselman; Washington Hospital Center, Washington, DC – D. Herr; The Iowa Clinic, Des Moines, IA – G. Hicklin; St. Mary’s Hospital, Waterbury, CT – D. Hill; Plantation General Hospital, Plantation, FL – E. Hirsch; Ohio State University Medical Center, Columbus, OH – S. Hoffman; Kaleida Health/Buffalo General Hospital, Buffalo, NY – C. Hsaio; Riverside Methodist Hospital, Columbus, OH – A. Imm; University of Florida Health Sciences Center, Gainesville, FL – M. Jantz; St. Vincent Mercy Medical Center, Toledo, OH – L. Jauregui; Presbyterian Hospital, Charlotte, NC – O. Jarvis; Via Christi St. Francis, Wichita, KS – G. Jost; Texas Tech University Health Sciences Center, Lubbock, TX – C. Jumper; New York Presbyterian Hospital, New York, NY – R. Kaner; Albert Einstein Medical Center, Philadelphia, PA – M. Kaplan; New York University Medical Center, New York, NY – B. Kaufman; St. Luke’s Medical Center, Phoenix, AZ – R. Kearl; St. Francis Hospital, Tulsa, OK – G.

Kennedy; Swedish Hospital and Medical Center, Englewood, CO – J. Kepros; University of California San Diego Medical Center, La Jolla, CA – K. Kerr; University of Utah Medical Center, Salt Lake City, UT – E. Kimball; Hennepin County Medical Center, Minneapolis, MN – J. Kraatz; Eastern Idaho Regional Medical Center, Idaho Falls, ID – K. Krell; Jefferson Regional Medical Center, Pittsburgh, PA – D. Laman; Inova Fairfax Hospital, Falls Church, VA – J. Lamberti; University of Florida, Jacksonville, FL – L. Laos; Olathe Medical Center, Olathe, KS – D. Lawlor; Intermountain Health Care McKay-Dee Hospital, Ogden, UT – C. Lawton; Stormont-Vail Healthcare, Topeka, KS – W. Leeds; Westchester Medical Center, Valhalla, NY – R. Lerner; Northwest Community Hospital, Arlington Heights, IL – N. Lidsky; St. Thomas Hospital, Nashville, TN – R. Light; Loma Linda University Medical Center, Loma Linda, CA – T. Lo; Memorial Hermann Hospital, Houston, TX – R. Lodato; Metrohealth Medical Center, Cleveland, OH – M. Malangoni; Sound Shore Medical Center of Westchester, New Rochelle, NY – M. Mandel; West Suburban Hospital Medical Center, Oak Park, IL – B. Margolis; United Health Services Hospitals, Johnson City, NY – J. Marsh; Emory University Hospital, Atlanta, GA – G. Martin; Harris Methodist Hospital, Fort Worth, TX – L. Martinez; University Hospital, Syracuse, NY – W. Marx; Washington University School of Medicine, St. Louis, MO – J. Mazuski; Alta Bates Medical Center, Berkeley, CA – J. McFeely; Via Christi Regional Medical Center, St. Francis Campus, Wichita, KS – T. Moore; Latter Day Saints Hospital, Salt Lake City, UT – A. Morris; North Carolina Baptist Hospital, Winston-Salem, NC – P. Morris; St. Elizabeth Medical Center, Edgewood, KY – N. Moser II; Wilford Hall Medical Center, Lackland AFB, TX – D. Mueller; Long Island Jewish Medical Center, New Hyde Park, NY – A. Mulz; Baptist Medical Center, Jacksonville, FL – A. Namen; Northeast Baptist Hospital, San Antonio, TX – M. Natalino; Methodist Hospital of Indiana, Inc., Indianapolis, IN – C. Naum; Integris Baptist Medical Center, Inc., Oklahoma City, OK – L. Nelson; University of Oklahoma Health Sciences Center, Oklahoma City, OK – C. O’Hare; Paradise Valley Hospital, National City, CA – W. O’Riordan; Danbury Hospital, Danbury, CT – D. Oelberg; Medical College of Ohio Hospital, Toledo, OH – D. Olson; North Shore University Hospital, Manhasset, NY – D. Ost; Palomar Medical Center, Escondido, CA – J. Otoshi; Medical Center Hospital, Odessa, TX – L. Oud; Phoebe Putney Memorial

Hospital, Albany, GA – J. Palazzolo; York Hospital, York, PA – R. Panos; St. Louis University Hospital, St. Louis, MO – N. Parkar; St. Jude Medical Center, Fullerton, CA – J. Pearle; Providence St. Joseph’s Medical Center, Burbank, CA – T. Pendleton; Littleton Adventist Hospital, Littleton, CO – D. Perlman; University Medical Center, Fresno, CA – M. Peterson; Christus Spohn Hospital-Corpus Christi Memorial, Corpus Christi, TX – S. Peterson; University of Kansas Medical Center, Kansas City, KS – S. Pingleton; Forum Health, Youngstown, OH – J. Politis; Hackensack University Medical Center, Hackensack, NJ – M. Polkow; University Community Hospital, Tampa, FL – J. Prieto; Fort Sanders Parkwest Medical Center, Knoxville, TN – J. Prince, Jr.; Mission St. Joseph’s Health System, Asheville, NC – R. Pritchard; Southern Regional Medical Center, Riverdale, GA – R. Prokesch; Memorial Hospital, Colorado Springs, CA – R. Rains; Florida Medical Center, Fort Lauderdale, FL – R. Ramirez; William Beaumont Hospital, Royal Oak, MI – K. Ravikrishnan; Lake Charles Medical and Surgical Center, Lake Charles, LA – C. Reed; Reid Hospital and Health Care Services, Richmond, IN – D. Reihman; St. Joseph’s Hospital, Tampa, FL – D. Reina; Rapid City Regional Hospital, Rapid City, SD – J. Reyno; Broward General Hospital, Ft. Lauderdale, FL – G. Richmond; Maine Medical Center, Portland, ME – R. Riker; Alameda County Medical Center, Oakland, CA – R. Rodriguez; Mount Sinai Hospital, Chicago, IL – J. Rosman; Suburban Hospital, Bethesda, MD – L. Rotello; St. Elizabeth Regional Medical Center, Lincoln, NB – J. Rudersdorf; St. Mary’s Medical Center, Huntington, WV – T. Rushton; Stamford Hospital, Stamford, CT – P. Sachs; Florida Hospital, Altamonte Springs, FL – P. Sanchez; Opelousas General Hospital, Opelousas, LA – J. Santiago; South Florida Veterans Affairs Medical Center, Miami, FL – R. Schein; Greenville Memorial Medical Campus, Greenville, SC – J. Schrank; Washington University School of Medicine, St. Louis, MO – D. Schuster; Providence Hospital, Mobile, AL – A. Seibert; Fort Sanders Regional Medical Center, Knoxville, TN – D. Sellers; George Washington University Medical Center, Washington, DC – M. Seneff; Brackenridge Hospital, Austin, TX – M. Shapiro; Anderson Cancer Center, Houston, TX – A. Shaw; University of New Mexico Health Sciences Center, Albuquerque, NM – C. Shermer; Yale-New Haven Hospital, New Haven, CT – M. Siegel; St. Joseph’s Hospital and Medical Center, Phoenix, AZ – J. Siever; St. John Detroit Riverview Hospital, Detroit, MI – R. Sikand; University of

Maryland Medical Center, Baltimore, MD – H. Silverman; Tulane University Health Sciences Center, New Orleans, LA – F. Simeone; Henry Ford Hospital Detroit, Detroit, MI – M. Simonff; Jacobi Medical Center, Bronx, NY – R. Simon; Wellstar Cobb Hospital, Austell, GA – S. Simon; Western Medical Center, Santa Ana, CA – N. Singh; West Tennessee Healthcare Foundation Jackson-Madison County General Hospital, Jackson, TN – P. Sioson; Cedars Medical Center, Miami, FL – C. Sklaver; Christus St. Francis Cabrini Hospital, Alexandria, LA – G. Smith; Geisinger Medical Center, Danville, PA – J. Smith; Southeastern Lung Care, Decatur, GA – D. Snyder; Abington Memorial Hospital, Abington, PA – R. Snyder; Albany Medical Center Hospital, Albany, NY – S. Socaris; Eisenhower Medical Center, Rancho Mirage, CA – M. Somero; John G. Southard, MD, Jennie Edmundson Hospital, Council Bluffs, IA – J. Southard; Upper Chesapeake Medical Center, Bel Air, MD – A. Spevetz; Veterans Affairs Medical Center, Omaha, NE – J. Spurzem; Mount Carmel Medical Center, Columbus, OH – R. St. John; Rhode Island Hospital, Providence, RI – M. Stanchina; Baystate Medical Center, Springfield, MA – J. Steingrub; McKee Medical Center, Loveland, CO – E. Stevens; St. Rita's Medical Center, Lima, OH – R. Stienecker; Memorial Hospital, Cumberland, MD – J. Stone; Medical University of South Carolina, Charleston, SC – C. Strange; Christus Spohn Hospital Corpus Christi-Shoreline, Corpus Christi, TX – S. Surani; Russell Medical Center, Alexander City, AL – R. Sussmane-Stubbs; Beth Israel Deaconess Medical Center-West Campus, Boston, MA – D. Talmor; St. John's Mercy Medical Center, St. Louis, MO – R. Taylor; Medcenter One Health Systems, Bismarck, ND – A. Tello; Maimonides Medical Center, Brooklyn, NY – S. Tessler; MeritCare Hospital, Fargo, ND – M. Tieszen; St. Francis Hospital, Peoria, IL – W. Tillis; Providence Everett Medical Center, Everett, WA – A. Tural; Sutter General Hospital, Sacramento, CA – J. Turner; Medcentral Health System, Mansfield, OH – P. Vaidya; University of Utah Medical Center, Salt Lake City, UT – D. Vargo; Lahey Clinic, Burlington, MA – A. Villanueva; Toledo Hospital, Toledo, OH – R. Wainz; St. Mary's Hospital, Rogers, AR – G. Waldon; Borgess Medical Center, Kalamazoo, MI – J. Walsh; Santa Barbara Cottage Hospital, Santa Barbara, CA – K. Waxman; Presbyterian Hospital, Dallas, TX – K. Weinmeister; Spectrum Health East, Grand Rapids, MI – J. Wilt; Veterans Affairs Medical Center, Long Beach, CA – D. Wong; Moses Cone Memorial Hospital,

Greensboro, NC – P. Wright; St. Joseph’s Hospital, Fort Wayne, IN – B. Youn; John Peter Smith Hospital, Fort Worth, TX – D. Ziegler; **Canada:** Hopital Sacre Coeur, Montreal, QC – M. Albert; Hopital Hotel Dieu du CHUM, Montreal, QC – R. Bouali; Victoria Medical Center, Hamilton, ON – C. Bradley; Pulmonary and Critical Care Consultants, Windsor, ON – A. Dhar; Foothills Medical Center, Calgary, AB – C. Doig; Vancouver General Hospital, Vancouver, BC – J. Fenwick; Sunnybrook and Women’s College Health Sciences Centre, Toronto, ON – R. Fowler; Queen Elizabeth II Health Sciences Center Halifax Infirmery, Halifax, NS – R. Hall; Kingston General Hospital, Kingston, ON – D. Heyland; Misericordia Hospital/Caritas Health Group, Edmonton, AB – M. Jacka; Regina General Hospital, Regina, SK – D. Jones; Ottawa Hospital, Ottawa, ON – G. Jones; William Osler Health Centre Brampton Campus, Brampton, ON – B. Kashin; Royal Columbian Hospital, New Westminster, BC – S. Keenan; Rockyview General Hospital, Calgary, AB – A. Kirby; Royal Alexandra Hospital, Edmonton, AB – D. Kutsogiannis; Hopital Maisonneuve-Rosemont, Montreal, QC – B. Laufer; Centre de Recherche Clinique CHUS, Fleurimont, QC – O. Lesur; St. Boniface Hospital, Winnipeg, MB – R. Light; University of Alberta, Edmonton, AB – I. Mayers; Charles LeMoynes Hospital, Greenfield Park, QC – G. Poirier; St. Paul’s Hospital, Vancouver, BC – J. Russell; London Health Sciences Centre, London, ON – F. Rutledge; Grey Nuns Hospital, Edmonton, AB – D. Stollery; St. Michael’s Hospital, Toronto, ON – M. Ward; Mt. Sinai Hospital, Toronto, ON – R. Wax; Royal University Hospital, Saskatoon, SK – A. Wong; Peter Lougheed Centre, Calgary, AB – D. Zuege; **Argentina:** Policlínica Bancaria, Buenos Aires – J. Blugerman; Hospital Fernandez, Buenos Aires – D. Ceraso; Clínica Monte Grande, Monte Grande – O. Farina; Hospital Italiano, Buenos Aires – A. Gallesio; Hospital Posadas, Buenos Aires – B. Maskin; Sanatorio de la Trinidad, Buenos Aires – J. Neira; Hospital Privado de Córdoba, Córdoba – E. Romero; Hospital Clemente Alvarez, Santa Fe – C. Rondina; Hospital Muñiz, Buenos Aires – J. San Juan; Centro de Educación Médica e Investigaciones Clínicas, Buenos Aires – R. Valentini; **Australia:** Royal Hobart Hospital, Hobart, Tasmania – A. Bell; Austin and Repatriation Medical Centre, Heidelberg, Victoria – R. Bellomo; Flinders Medical Centre, Bedford Park, South Australia – A. Bersten; Dandenong Hospital, Dandenong, Victoria – M. Buist; Royal Melbourne Hospital, Parkville, Victoria – J. Cade; Royal Adelaide Hospital, Adelaide,

South Australia – M. Chapman; The Alfred Hospital, Prahan, Victoria – A. Davies; St. Vincent's Hospital, Fitzroy, Victoria – B. Dixon; Royal Perth Hospital, Perth, Western Australia – G. Dobb; Box Hill Hospital, Box Hill, Victoria – D. Ernest; Royal North Shore Hospital, St. Leonards, New South Wales – Simon Finfer; Western Hospital, Footscray, Victoria – C. French; The Canberra Hospital, Garran, ACT – J. Gowardman; The Canberra Hospital, Garran, ACT – I. Leditschke; The Royal Brisbane Hospital, Hersten, Queensland – J. Lipman; Liverpool Hospital, Liverpool, New South Wales – M. Parr; Sir Charles Gairdner Hospital, Nedlands, Western Australia – M. Pinder; Nepean Hospital, Penrith, New South Wales – I. Seppelt; Prince of Wales Hospital, Randwick, New South Wales – Y. Shehabi; Royal Darwin Hospital, Darwin, Northern Territory – D. Stephens; **Austria:** Allgemeines Krankenhaus der Stadt Wien, Wien – M. Frass; Landeskrankenhaus Innsbruck, Innsbruck – M. Joannidis; Allgemeines Krankenhaus der Stadt Wien, Wien – C. Krenn; **Belgium:** Universitair Ziekenhuis Gent, Gent – J. Decruyenaere; Centre Hospitalier Universitaire Sart Tilman, Liege – P. Damas; Clinique St. Pierre, Ottignies – T. Dugernier; Centre Hopitalier Regional-Clinique St. Joseph, Mons – F. Forêt; Cliniques Universitaires UCL de Mont-Godinne, Mont-Godinne – E. Installé; Cliniques Universitaires Saint-Luc, Bruxelles – P. Laterre; University Hospital Free University of Brussels, Brussels – H. Spapen; Hôpital Universitaire Erasme Brussels, Bruxelles – J. Vincent ; **Brazil:** Hospital São Paulo, Paulo, SP – J. Amaral; Hospital Copa D'Or, Rio de Janeiro, RJ – J. Castro; Hospital das Clínicas de Faculdade de Medicina da USP, São Paulo, SPC – L. da Cruz Neto; Hospital Sírio Libanês, São Paulo, SP – P. Glavão; Hospital Israelita Albert Einstein, São Paulo, SP – E. Knobel; Instituto do Coração do HCFMUSP, São Paulo, SP – S. Lage; Hospital de Base de São José do Rio Preto, São Pedro do Rio Preto, SP – S. Lobo; Hospital das Clínicas de Faculdade de Medicina da USP, São Paulo, SP – F. Machado; Hospital de Clínicas da UFPR, Curitiba, PR – A. Neto; Hospital Geral do Grajaú, São Paulo, SP – E. Silva; Instituto de Infectologia Emilio Ribas, São Paulo, SP – J. Sztajn bok; Hospital Barra D'Or, Rio de Janeiro, RJ – J. Verdeal ; **Chile:** Clinica Dávila, Santiago – M. Alamo; Hospital Regional de Temuco, Temuca – C. Castillo; Hospital Dipreca, Independencia – J. Castro; Hospital Clínico de la Universidad Católica de Chile, Santiago – G. Hernandez; **Czech Republic:** Inf. Klinika 3.LF UK, FN Na Bulovce, Praha – J. Benes; KARIM FN

Hradec Kralove, Hradec Kralove – V. Cerny; KICH FN Brno, Brno – P. Chalupa; ARK FN Plzen, Plzen – E. Kasal; ARK FN U Svate Anny, Brno – R. Kraus; mJIP FN Plzen, Plzen – I. Novak; ARK FN Kralovske Vinohrady, Praha – J. Pacht; Urazova nemocnice v Brne, Brno – P. Svoboda; **Denmark:** Hvidovre Hospital, Hvidovre – P. Carl; Amtssygehuset Roskilde, Roskilde – N. Drenck; Viborg-Kjellerup Sygehus, Viborg – K. Knudsen; Centralsygehuset I Esbjerg, Esbjerg – A. Lahoz; **Egypt:** New Al Kasr Al Aini Teaching Hospital, Cairo – Y. Khater; Cairo University, Cairo – S. Mokhtar; German Hospital, Alexandria – A. Razek; **Finland:** Oulu University Hospital, OYS – T. Ala-Kokko; Central Finland Central Hospital, Jyväskylä – R. Laru-Sompa; Turku University Hospital, Turku – J. Perttilä; Helsinki University Hospital, HUS – V. Pettilä; Tampere University Hospital, Tampere – E. Ruokonen; Kuopio University Hospital, Kuopio – A. Uusaro; **France:** Hôpital Raymond Poincaré, Garches – D. Annane; Hôpital de L'Archet, Nice – G. Bernardin; Hôpital du Bocage, Dijon – B. Blettery; Hôpital de Brabois, Nancy – P. Bollaert; Fondation Hôpital Saint Joseph, Paris – J. Carlet; Centre Hospitalier de Villefranche, Gleize – C. Combe; de Ranguel, Toulouse – P. Cougot; Hôpital Carémeau, Nîmes – J. de la Coussaye; Centre Hospitalier Paul Morel, Vesoul – C. Floriot; Centre Hospitalier Delafontaine, Saint Denis – F. Fraisse; Hôpital Dupuytren, Limoges – B. Francois; de Pontchaillou, Rennes – Y. Malledant; Hôpital Beaujon, Clichy – J. Marty; Hôpital Cochin, Paris – J. Mira; Hôpital Jean Verdier, Bondy – P. Montravers; Hôpital Robert Ballanger, Aulnay-sous-Bois – B. Mourvillier, F. Hilpert; CHI Poissy St-Germain, Poissy – Hervé Outin; Hôpital Lariboisiere, Paris – D. de la Garanderie; Hôpital Bretonneau, Tours – D. Perrotin; Hôpital Edouard Herriot, Lyon – P. Petit; CHU de Bicêtre, Le Kremlin Bicêtre – C. Richard; Centre Hospitalier Victor Dupouy, Argenteuil – J. Sollet; Centre Hospitalier René Dubos, Pontoise – G. Trouillet; Hôpital Claude Huriez, Lille – B. Vallet; Hôpital Bellevue, Saint-Etienne – F. Zeni ; **Germany:** Universitätsklinikum der Georg-August-Universität, Göttingen – S. Andreas; Universitätsklinikum Mannheim, Mannheim – M. Brückman; Universitätsklinikum Lübeck, Lübeck – C. Dodt; Universitätsklinikum Tübingen, Tübingen – C. Erly; Medizinische Hochschule Hannover, Hannover – D. Fliser; Universitätsklinikum Regensburg, Regensburg – T. Glück; Theresienkrankenhaus/St. Hedwig Klinik, Mannheim – M. Haass; Allgemeines Krankenhaus Hamburg-Harburg, Hamburg – T.

Klöss; Universität Freiburg-Anaesthesiologische Klinik, Freiburg – K. Kopp; Medizinische Universität zu Lübeck, Lübeck – P. Kujath; Helios Klinikum Erfurt GmbH, Erfurt – A. Meier-Hellmann; Zentralkrankenhaus Bremen-Mitte, Bremen – B. Mühlbauer; Universitätsklinikum der Georg-August-Universität, Göttingen – P. Neumann; Städt. Krankenhaus München-Harlaching, München – C. Peckelsen; Rheinische Friedrich-Wilhelm-Universität Bonn, Bonn – C. Putensen; Universitätsklinikum Tübingen, Tübingen – R. Riessen; Universitätsklinikum Aachen, Aachen – R. Rossaint; Klinikum der Medizinischen Fakultät der Martin-Luther-Universität, Halle/Saale – A. Sablotzki; Universitätsklinikum Essen, Essen – F. Saner; Medizinische Hochschule Hannover, Hannover – T. Schürholz; Charité Campus Berlin Mitte, Berlin – C. Spies; Universitätsklinikum Tübingen, Tübingen – K. Unertl; Universität Freiburg-Chirurgische Klinik, Freiburg – S. Utzolino; **India:** Bombay Hospital Institute of Medical Sciences, Mumbai, Maharashtra – P. Amin; Narayana Hridayalaya, Bangalore, Karnataka – R. Gupta; PD Hinduja Hospital, Mumbai, Maharashtra – F. Kapadia; Deenanath Mangeshkar Hospital, Pune, Maharashtra – P. Rajhans; Sir Gangaram Hospital, New Delhi – B. Rao; Nizam's Institute of Medical Sciences, Hyderabad, AP – S. Rao; Ruby Hall Clinic, Pune, Maharashtra – P. Sathe; Care Institute of Medical Sciences, Hyderabad, AP – S. Talluri; Metro Hospital and Heart Insitute, Noida, UP – D. Talwar; Apollo Hospital, Hyderabad, AP – A. Vigg; **Italy:** Arcispedale Santa Anna, Ferrara – R. Alvisi; Ospedale di Treviglio, Treviglio (Bergamo) – M. Borelli; Azienda USL LE/1, Lecce – R. Caione; Azienda Ospedaliera S. Gerardo dei Tintori, Monza (Milano) – G. Foti; Azienda Ospedaliera Polo Universitaria, Milano – G. Iapichino; Ospedale Bucchieri la Ferla Fatebenefratelli, Palermo – V. Lanza; Ospedale di Lecco, Lecco – R. Massei; Ospedale Vittorio Emanuele, Catania – B. Panascia; Azienda Ospedaliera Umberto I, Ancona – P. Pelaia; Ospedale Brotzu, Cagliari – P. Pettinao; **Lebanon:** Hotel Dieu de France, Beirut – G. Dabar; American University of Beirut Medical Center, Beirut – G. Jamaledine; **Mexico:** Hospital Angeles del Pedregal, Mexico D.F. – J. Esponda; Hospital ABC, Mexico D.F. – J. Franco; Hospital Central Militar, Mexico D.F. – J. Pescina; Medica Sur, Tlalpan, Mexico D.F. – M. Remolina; Instituto Nacional de la Nutricion Salvador Zubiran, Tlalpan, Mexico D.F. – E. Rivero; **The Netherlands:** Jeroen Bosch Ziekenhuis, NL, 's Hertogenbosch – F. Rozendaal; Sint

Elisabeth Ziekenhuis, GC, Tilburg – B. Speelberg; Gelre Ziekenhuis, DZ, Apeldoorn – P. Spronk; **New Zealand:** Hawkes Bay Hospital, Hastings – R. Freebairn; Christchurch Hospital, Christchurch – S. Henderson; Auckland Hospital, Grafton, Auckland – C. McArthur; Waikato Hospital, Hamilton – J. Torrance; **Norway:** Sykehuset Buskerud HF, Drammen – D. Aarhus; Akershus Universitetssykehus, Nordbyhagen – J. Berdal; Sentralsykehuset i Møre og Romsdal, Alesund – J. Bøen; Ullevål Universitets-sykehus, Oslo – D. Jacobsen; Aker Universitetssykehus, Oslo – R. Løvstad; **Philippines:** Philippine Heart Center, Quezon City – S. Abad; FEU-NRMF Memorial Hospital, Quezon City – P. Salandanan; **Romania:** Spitalul Clinic de Urgenta Floreasca, Bucharest – I. Grintescu; Institutul Clinic Matei Bals, Bucharest – A. Streinu-Cercel; Institutul Clinic Fundeni, Bucharest – D. Tulbure; **Russia:** S.P. Botkin Hospital, Moscow – V. Beloborodov; City Hospital #1, Moscow – B. Gelfand; Railway Central Clinical Hospital, Moscow – E. Nicolaenko; Burdenko Main Military Hospital, Moscow – A. Shestopalov; Railway Hospital, Moscow – S. Shlyapnikov; Oblast Clinical Hospital, Smolensk – L. Stratchounski; City Clinic #7, Moscow – S. Yakovlev; **Saudi Arabia:** King Abdul-Aziz University Hospital, Jeddah – J. Hashemi; The Military Hospital, Riyadh – S. Jacobs; King Faisal Specialist Hospital and Research Center, Jeddah – M. Kherallah; King Faisal Specialist Hospital and Research Center, Jeddah – G. Miller; **Singapore:** National University Hospital, Singapore – K. Lee; Singapore General Hospital, Singapore – J. Raghuram; **Slovak Republic:** KAIM FNsp, Kosice – J. Firment; KAIM FNsp Ruzinov, Bratislava – K. Kalig; KAIM FNsp Kramare, Bratislava – M. Majek; **South Africa:** Tygerberg Hospital, Bellville – E. Irusen; Universitas Hospital, Bloemfontein – R. Krog; Universitas Hospital, Bloemfontein – C. Martins; Vergeleegen Medi-Clinic, Somerset West – C. Pretorius; Pretoria Academic Hospital, Pretoria – J. Pretorius; Kimberly Hospital, Kimberly – P. van den Berg; **Spain:** Hospital de Galdakao, Galdakao – P. Astigarraga; Hospital Rio Hortega, Valladolid – J. Blanco; Hospital Puerta del Mar, Cádiz – R. Camerino; Hospital General Yague, Burgos – M. Herranz; Hospital Universitario de Getafe, Getafe – A. de la Torre; Hospital Morales Meseguer, Murcia – G. Diaz; Hospital Clinico Universitario de Santiago, Santiago de Compostela – J. Escudero; Hospital Universitario Nuestra Virgen de Valme, Sevilla – C. Gil; Hospital del Mar, Barcelona – F. Lerma; Hospital Virgen del Rocio, Sevilla – C. Leyba; Hospital

Universitario la Fe, Valencia – M. Marco; Consorci Hospitalari Parc Tauli, Sabadell – A. Raventos; Hospital Infanta Cristina, Badajoz – A. Rodriguez; Hospital La Princesa, Madrid – F. Rueda; Hospital de Gran Canaria Dr. Negrin, Las Palmas, de Gran Canaria – S. Santana; Hospital Josep Trueta, Girona – A. Saris; Hospital Universitario de Canarias, Santa Cruz de Tenerife – J. Sarrias; Hospital General de Castellón, Castellón – A. Selles; Hospital Gral Universitario de Alicante, Alicante – J. Such; **Sweden:** Centralsjukhuset, Kristianstad – K. Brodersen; Sundsvalls Sjukhus, Sundsvall – P. Eriksson; Falun Lasarett, Falun – P. Guldbbrand; Sahlgrenska Universitetssjukhuset, Göteborg – L. Hagberg; Östersunds Sjukhus, Östersund – C. Starlander; Karolinska Universitetssjukhuset, Stockholm – L. Tokics; **Switzerland:** Hôpitaux Universitaires de Genève, Genève – J. Garbino; Universitätsspital Zürich, Zürich – M. Maggiorini; Universitätsspital Bern, Bern – J. Takala ; **Taiwan:** Chi Mei Foundation Hospital, Yung-Kung City, Tainan County – K. Cheng; Chang Gung Memorial Hospital, Taipei – T. Hwang; China Medical University Hospital, Taichung – J. Wang; Veterans General Hospital-Taipei, Taipei – H. Yien; National Taiwan University Hospital, Taipei – C. Yu; **Thailand:** Siriraj Hospital, Bangkok Noi, Bangkok – A. Leelarasamee; Srinakarin Hospital, Khon Kaen – P. Mootsikapun; Maharajnakorn Chiang Mai Hospital, Chiang Mai – K. Supparatpinyo; Chulalongkorn University, Bangkok – P. Suwangool; **United Kingdom:** St. Thomas's Hospital, London – R. Beale; St. John's Hospital, Livingston, West Lothian – M. Brockway; Victoria Infirmary, Glasgow – A. Davidson; Manchester Royal Infirmary, Manchester – J. Eddlestone; Norfolk and Norwich University Hospital, Norwich – S. Fletcher; Birmingham Heartlands Hospital, Bordesley Green, Birmingham – F. Gao-Smith; Royal Berkshire Hospital, Reading, Berkshire – A. Kapila; Wythenshawe Hospital, Wythenshawe, Manchester – I. Kapila; Derriford Hospital, Plymouth, Devon – P. MacNaughton; Leeds General Infirmary, Leeds – A. Mallick; Charing Cross Hospital, Hammersmith, London – M. Palazzo; Kent and Sussex Hospital, Tunbridge Wells, Kent – P. Sigston; Royal Surrey County Hospital, Guildford, Surrey – M. Zuleika; **ADDRESS Data Monitoring Committee:** S. Opal, Chairman, Memorial Hospital, Boston, MA, USA; E. Davis, University of North Carolina Statistics Dept, USA; J.F. Dhainaut, Groupe Hopitalier Cocchin, Paris, France; M. Matthay, Stanford University Hospital, USA; C. Sprung, Hadassah Hebrew University medical Center,

Israel; J. Whitehead, MPS Research Unit, University of Reading, UK; **ADDRESS**  
**Executive Committee:** E. Abraham, University of Colorado Health Sciences Center,  
Denver, CO, USA; P.F. Laterre, St. Luc University Hospital, UCL, Brussels, Belgium; D.  
Angus, University of Pittsburgh School of Medicine, Pittsburgh, PA; G. Bernard,  
Vanderbilt University Medical Center, TN; R. Califf, Duke Clinical Research Institute;  
D. Maki, University of Wisconsin; J. A. Russell, St. Paul's Hospital, Vancouver, BC;  
J.L.Vincent, Erasme University Hospital, Brussels, Belgium; **ADDRESS Steering**  
**Committee Members:** D. Cook, St. Joseph Hospital, Canada; J.Carlet, Hospital Saint  
Joseph, France; D. Payen, Professor, Hospital Lariboisiere-Fernand, Widal, France; K.  
Reinhart, Friedrich Schiller-Universität, Jena, Germany; R. Rossaint,  
Universitätsklinikum Aachen Klinik für Anästhesiologie, Germany; A. Pesenti, Istituto di  
Anestesia e Rianimazione, Italy; G. Ramsay, Hospital Apeldoorn, Netherlands; A.  
Artigas, Hospital de Sabadell, Spain; D. Wyncoll, St. Thomas' Hospital, United  
Kingdom; T. Buchman, Barnes Jewish Hospital, Washington University, USA; T. B.  
Thompson, Massachusetts General Hospital, MA, USA
